# Supplementary material for: The association between self-efficacy and self-management behaviors among Chinese patients with type 2 diabetes
Source: PubMed Central journal article supplement (PMC6844544; doi:10.1371/journal.pone.0224869), 2019-11-11
Supplement: pone.0224869.s001.pdf [file pone.0224869.s001.pdf]

# 居民健康问卷

调查对象姓名：\_\_\_\_\_ 个人编码：\_\_\_\_\_

家庭地址：\_\_\_\_\_ 县\_\_\_\_\_ 乡(镇)\_\_\_\_\_ 村

调查员：\_\_\_\_\_ 问卷审核员：\_\_\_\_\_

## 知情同意书

我们非常真挚地邀请您参加一个关于糖尿病自我行为的调查。该课题是由山东大学医药卫生管理学院的孙强教授主持，主要目的是了解山东省 2 型糖尿病患者的自我管理行为状况。该调查主要采用面对面询问的方式，调查的时间大概为 10-20 分钟。

该调查的数据主要用于科学研究，无任何商业利益。课题组所有成员均将严格执行信息保密规定，确保您个人信息的安全。除必要情况下，伦理委员会和政府管理部分进行数据审查，在未经您容许的情况下，数据禁止外泄他人。

本次调查，纯凭个人意愿。如果有任何疑问您可以向我们的研究人员进行咨询；同时，在参与的过程中，您也可以随时选择退出。且不会对您产生任何健康或者利益损失。

## 知情同意书签名：

本人已了解这次调查，并对调查员的说明感到满意，我自愿参加这项询问调查及提供相关信息。

调查对象签名\_\_\_\_\_

签名日期： 年 月 日

## 第一部分 个人基本情况

| 问题                                                                                                                                  | 答案 |
|-------------------------------------------------------------------------------------------------------------------------------------|----|
| <b>A1.</b> 居住地: (1) 城市; (2) 农村                                                                                                      |    |
| <b>A2.</b> 性别: (1) 男; (2) 女                                                                                                         |    |
| <b>A3.</b> 您的年龄为: _____ 岁                                                                                                           |    |
| <b>A4.</b> 您的婚姻状况: (1) 未婚; (2) 已婚; (3) 离异或分居; (4) 丧偶                                                                                |    |
| <b>A5.</b> 您的文化程度:<br>(1) 没上过学; (2) 小学; (3) 初中; (4) 高中/技校/中专/中技; (5) 大专及以上                                                          |    |
| <b>A6.</b> 过去一年, 您的居住方式:<br>(1) 配偶; (2) 独居; (3) 子女; (4) 配偶及子女; (5) 兄弟姐妹; (6) 其他                                                     |    |
| <b>A7.</b> 过去一年, 您家的常住人口数: _____ 人                                                                                                  |    |
| <b>A8.</b> 过去一年, 您家的总收入: _____ (万元)<br>提示: 收入来源包括, 种植收入、打工收入、资产收入和其他收入                                                              |    |
| <b>A9.</b> 您诊断为糖尿病的时间为: _____ 年                                                                                                     |    |
| <b>A10.</b> 您是否有糖尿病的并发症(多选):<br>(1) 糖尿病眼病;<br>(2) 糖尿病足病;<br>(3) 糖尿病心血管病;<br>(4) 糖尿病脑血管病<br>(5) 糖尿病肾病;<br>(6) 其他, 注明 _____<br>(7) 没有 |    |

## 第二部分 糖尿病患者管理状况

| 问题                                                                               | 答案 |
|----------------------------------------------------------------------------------|----|
| <b>B1.</b> 您平时是否会控制每日饮食总量? (1) 是; (2) 否                                          |    |
| <b>B2.</b> 您平时是否会避免吃高脂肪的饮食(如: 油炸食品、糕点、肥肉)? (1) 是; (2) 否                          |    |
| <b>B3.</b> 您平时是否会避免食用含糖量高的食物(如: 糖、某些水果比如西瓜、蛋糕等)? (1) 是; (2) 否                    |    |
| <b>B4.</b> 经常参加的体育锻炼是? (1) 低强度(走路、打太极拳类等); (2) 中等强度(快走、跳舞); (3) 高强度(跑步、骑车、游泳、打球) |    |
| <b>B5.</b> 平均每周参加几次这种身体活动? _____ 次                                               |    |
| <b>B6.</b> 您平均每次参加身体活动的时间为? (1) 小于 15 分钟; (2) 15-30 分钟; (3) 30-60 分钟 (4) 60 分钟以上 |    |
| <b>B7.</b> 过去 2 周内, 是否有一天或者几天您忘记服药? (1) 是; (2) 否                                 |    |
| <b>B8.</b> 过去半年内, 当您觉得症状加重时, 您是否未告知医生而自行减少药量或者停止服药? (1) 是; (2) 否                 |    |
| <b>B9.</b> 过去半年内, 当你觉得自己的病情得到控制时, 您是否停止过服药? (1) 是; (2) 否                         |    |
| <b>B10.</b> 您进行血糖自我测试的频率为? _____                                                 |    |

### 第三部分 自我管理效能

| 问题                                                                                   | 答案 |
|--------------------------------------------------------------------------------------|----|
| <b>C1.</b> 我相信：我知道日常的糖尿病管理中哪些方面做的不到位<br>(1)非常认同；(2)认同；(3)一般；(4)不认同；(5)非常不认同          |    |
| <b>C2.</b> 我相信：我可以通过一个可行的管理方案实现我的糖尿病控制目标<br>(1)非常认同；(2)认同；(3)一般；(4)不认同；(5)非常不认同      |    |
| <b>C3.</b> 我相信：我可以想出一些办法去克服障碍去实现目标<br>(1)非常认同；(2)认同；(3)一般；(4)不认同；(5)非常不认同            |    |
| <b>C4.</b> 我相信：我可以让自己心理上更加适应糖尿病<br>(1)非常认同；(2)认同；(3)一般；(4)不认同；(5)非常不认同               |    |
| <b>C5.</b> 我相信：我知道运用积极的方式应对糖尿病带来的心理压力<br>(1)非常认同；(2)认同；(3)一般；(4)不认同；(5)非常不认同         |    |
| <b>C6.</b> 我相信：我当自己需要护理和治疗方面的帮助或者支持时可以有效进行求助<br>(1)非常认同；(2)认同；(3)一般；(4)不认同；(5)非常不认同  |    |
| <b>C7.</b> 我相信：我知道如何鼓励自己进行糖尿病的管理<br>(1)非常认同；(2)认同；(3)一般；(4)不认同；(5)非常不认同              |    |
| <b>C8.</b> 我相信：我对自己的病情有足够的了解，知道哪些医疗服务是对自己有帮助的<br>(1)非常认同；(2)认同；(3)一般；(4)不认同；(5)非常不认同 |    |
